# Supplementary material for: Multilevel factors influencing contraceptive use and childbearing among adolescent girls in Bara district of Nepal: a qualitative study using the socioecological model
Source: PubMed Central journal article supplement — BMJ Open. 2021 Oct 18;11(10):e046156. doi: 10.1136/bmjopen-2020-046156 (PMC8527108; doi:10.1136/bmjopen-2020-046156), 2021-10-18
Supplement: bmjopen-2020-046156supp001.pdf [file bmjopen-2020-046156supp001.pdf]

## S1 Topic guides (English)

## Topic Guide for Married Adolescent Girls

|                               |                                                                                                                                                                                                                                                                                                                                                                                                                                                                                                                                                                                                                                                                                                                                                                                                                                 |
|-------------------------------|---------------------------------------------------------------------------------------------------------------------------------------------------------------------------------------------------------------------------------------------------------------------------------------------------------------------------------------------------------------------------------------------------------------------------------------------------------------------------------------------------------------------------------------------------------------------------------------------------------------------------------------------------------------------------------------------------------------------------------------------------------------------------------------------------------------------------------|
| <b>Intrapersonal factors</b>  | <ul style="list-style-type: none"> <li>• Do you know that free family planning services are available in your municipality?</li> <li>• Do you know where to access free family planning services?</li> <li>• Which contraceptive methods do you know?</li> <li>• How do you perceive family planning services?</li> <li>• Have you ever used any contraceptive method?</li> <li>• Do you perceive the need for family planning services and information?</li> <li>• Do you feel shy to seek family planning services and information?</li> <li>• What challenges do you face in seeking family planning services?</li> <li>• Do you fear side effects of contraceptive use?</li> </ul>                                                                                                                                          |
| <b>Interpersonal factors</b>  | <ul style="list-style-type: none"> <li>• Do you discuss with your husband when to have a child and how many children to have?</li> <li>• Do you feel comfortable to negotiate contraceptive use with your husband?</li> <li>• Who has the power to make decision regarding whether to use contraceptives?</li> <li>• Does your husband agree or disagree to use contraceptives?</li> <li>• Do you have a final say on contraceptive use?</li> <li>• Do you perceive that there is power imbalance in terms of decision-making regarding family planning between you and your husband?</li> <li>• Do your mother-in-law or sisters-in-law influence your decision-making about contraceptive use?</li> <li>• Have you heard of your mother-in-law's or sisters-in-law's experience of using family planning services?</li> </ul> |
| <b>Community factors</b>      | <ul style="list-style-type: none"> <li>• Is there social consensus in your community that women should become pregnant soon after marriage?</li> <li>• Did you feel pressure to become pregnant soon after marriage? If so, who did you feel pressure from?</li> <li>• Has your religion something to do with non-use of contraceptives after marriage?</li> <li>• Do you sometimes exchange information about family planning with your friends?</li> <li>• Do FCHVs in this municipality discuss family planning services with young women like you?</li> </ul>                                                                                                                                                                                                                                                               |
| <b>Organizational factors</b> | <ul style="list-style-type: none"> <li>• Are local health care providers supportive of providing contraceptives to young women like you?</li> <li>• Are they friendly to young women like you?</li> <li>• Do you feel your privacy and confidentiality are maintained at a nearby health facility?</li> <li>• How long does it take to get to a nearby health facility providing family planning services?</li> </ul>                                                                                                                                                                                                                                                                                                                                                                                                           |

|                       |                                                                                                                                                                                                                                                              |
|-----------------------|--------------------------------------------------------------------------------------------------------------------------------------------------------------------------------------------------------------------------------------------------------------|
|                       | <ul style="list-style-type: none"><li>• Is there local transportation available to get to a nearby health facility providing family planning services?</li><li>• Would you need a permission from your husband if you go out to a health facility?</li></ul> |
| <b>Policy factors</b> | <ul style="list-style-type: none"><li>• Is there any restriction of family planning services on age?</li><li>• Is there any restriction of family planning services on marital status?</li></ul>                                                             |

## Topic Guide for Husbands of Married Adolescent Girls

|                               |                                                                                                                                                                                                                                                                                                                                                                                                                                                                                                                                                                                                                                                 |
|-------------------------------|-------------------------------------------------------------------------------------------------------------------------------------------------------------------------------------------------------------------------------------------------------------------------------------------------------------------------------------------------------------------------------------------------------------------------------------------------------------------------------------------------------------------------------------------------------------------------------------------------------------------------------------------------|
| <b>Intrapersonal factors</b>  | <ul style="list-style-type: none"> <li>• Do you know that free family planning services are available in your municipality?</li> <li>• Do you know where to access free family planning services?</li> <li>• Which contraceptive methods do you know?</li> <li>• How do they perceive family planning services?</li> <li>• Do you perceive the need for family planning services and information?</li> <li>• Do you feel shy to seek family planning commodity (condom) and information?</li> <li>• What challenges do you face in seeking family planning services?</li> <li>• Do you fear side effects of contraceptive use?</li> </ul>       |
| <b>Interpersonal factors</b>  | <ul style="list-style-type: none"> <li>• Do you discuss with your wife when to have a child and how many children to have?</li> <li>• Do you feel comfortable to discuss contraceptive use with your wife?</li> <li>• Who has the power to make decision regarding whether to use contraceptives?</li> <li>• Do you have a final say on contraceptive use?</li> <li>• Do you perceive that there is power imbalance between you and your wife?</li> <li>• Do your parents or anyone else influence your decision-making about contraceptive use?</li> <li>• Have you heard of anyone's experience of using family planning services?</li> </ul> |
| <b>Community factors</b>      | <ul style="list-style-type: none"> <li>• Is there social consensus in your community that women should become pregnant soon after marriage?</li> <li>• Did you feel pressure to get your wife pregnant soon after marriage? If so, who did you feel pressure from?</li> <li>• Has your religion something to do with non-use of contraceptives after marriage?</li> <li>• Do you sometimes exchange information about family planning with your friends?</li> <li>• Do FCHVs in this municipality discuss family planning services with men like you?</li> </ul>                                                                                |
| <b>Organizational factors</b> | <ul style="list-style-type: none"> <li>• Are local health care providers supportive of providing condoms?</li> <li>• Are they friendly to you when you go there to seek condoms?</li> <li>• Do you feel your privacy and confidentiality are maintained at a nearby health facility?</li> <li>• How long does it take to get to a nearby health facility providing condoms?</li> <li>• Is there local transportation available to get to a nearby health facility providing family planning services?</li> </ul>                                                                                                                                |

## Topic Guide for Mothers-in-law of Married Adolescent Girls

|                              |                                                                                                                                                                                                                                                                                                                                                                                                                                                                                                                                                                                                                                                                                                    |
|------------------------------|----------------------------------------------------------------------------------------------------------------------------------------------------------------------------------------------------------------------------------------------------------------------------------------------------------------------------------------------------------------------------------------------------------------------------------------------------------------------------------------------------------------------------------------------------------------------------------------------------------------------------------------------------------------------------------------------------|
| <b>Intrapersonal factors</b> | <ul style="list-style-type: none"> <li>• Do you know that free family planning services are available in your municipality?</li> <li>• Do you know where to access free family planning services?</li> <li>• Which contraceptive methods do you know?</li> <li>• How do they perceive family planning services?</li> <li>• What challenges do you think young couples face in seeking family planning services?</li> </ul>                                                                                                                                                                                                                                                                         |
| <b>Interpersonal factors</b> | <ul style="list-style-type: none"> <li>• Do you think your daughter-in-law should discuss family planning with her husband?</li> <li>• Did you feel comfortable to negotiate contraceptive use with your husband?</li> <li>• In your opinion, who should decide when to have a child and how many children to have</li> <li>• In your opinion, who should decide whether to use contraceptives?</li> <li>• Do you think your daughter-in-law should use contraceptives?</li> <li>• Are you influential in decision making about contraceptive use of your daughter-in-law?</li> <li>• Have you ever shared with your daughter-in-law your experience of using family planning services?</li> </ul> |
| <b>Community factors</b>     | <ul style="list-style-type: none"> <li>• Is there social consensus in your community that women should become pregnant soon after marriage?</li> <li>• When you were young, did you feel pressure to become pregnant soon after marriage? If so, who did you feel pressure from?</li> <li>• Do FCHVs in this municipality discuss family planning services with young couples?</li> </ul>                                                                                                                                                                                                                                                                                                          |

## Topic Guide for Health Care Providers, Health Coordinators and FCHVs

|                               |                                                                                                                                                                                                                                                                                                                                                                                                                                                                                                                                                                                                                                                                                                                                                                                                                                              |
|-------------------------------|----------------------------------------------------------------------------------------------------------------------------------------------------------------------------------------------------------------------------------------------------------------------------------------------------------------------------------------------------------------------------------------------------------------------------------------------------------------------------------------------------------------------------------------------------------------------------------------------------------------------------------------------------------------------------------------------------------------------------------------------------------------------------------------------------------------------------------------------|
| <b>Community factors</b>      | <ul style="list-style-type: none"> <li>• Is there social consensus in this community that women should become pregnant soon after marriage?</li> <li>• Has your religion something to do with non-use of contraceptives after marriage?</li> <li>• Do FCHVs in this municipality discuss family planning services with young couples?</li> </ul>                                                                                                                                                                                                                                                                                                                                                                                                                                                                                             |
| <b>Organizational factors</b> | <ul style="list-style-type: none"> <li>• What is a major challenge for local women especially when seeking family planning services in this municipality?</li> <li>• Do women in this municipality have to seek permission from their husband if they go out to a health facility?</li> <li>• What is a major challenge in providing family planning services in your municipality or health facility? (Availability of commodities and equipment, training for nurses/ANM)</li> <li>• What is your concern in family planning programme in this municipality? (budget, planning, leadership/governance, health information, supplies, availability and capacity of health workers)</li> <li>• Are there any other issues that one should be aware of when understanding access to family planning services in this municipality?</li> </ul> |
| <b>Policy factors</b>         | <ul style="list-style-type: none"> <li>• Is there any restriction of family planning services on age?</li> <li>• Can young people below the age of 18 receive family planning services in this municipality or facility as they wish?</li> <li>• Is there any restriction of family planning services on marital status?</li> <li>• Can unmarried couples receive family planning services in this municipality or facility as they wish?</li> </ul>                                                                                                                                                                                                                                                                                                                                                                                         |
