# Supplementary material for: Multilevel factors influencing contraceptive use and childbearing among adolescent girls in Bara district of Nepal: a qualitative study using the socioecological model
Source: PubMed Central journal article supplement — BMJ Open. 2021 Oct 18;11(10):e046156. doi: 10.1136/bmjopen-2020-046156 (PMC8527108; doi:10.1136/bmjopen-2020-046156), 2021-10-18
Supplement: bmjopen-2020-046156supp002.pdf [file bmjopen-2020-046156supp002.pdf]

**Supplementary 2:** Consolidated criteria for reporting qualitative studies (COREQ): a 32-item checklist

**Title:** Multilevel factors influencing contraceptive use and childbearing among adolescent girls in Bara district of Nepal: A qualitative study using the social-ecological model

**Authors:** Kazutaka Sekine, Nirajan Khadka, Rogie Royce Carandang, Ken Ing Cherng Ong, Anand Tamang, and Masamine Jimba

| Topic                                          | Guide questions/description                                                                                                                 | Response                                                                                                                                                                                                                                                                                                                                        |
|------------------------------------------------|---------------------------------------------------------------------------------------------------------------------------------------------|-------------------------------------------------------------------------------------------------------------------------------------------------------------------------------------------------------------------------------------------------------------------------------------------------------------------------------------------------|
| <b>Domain 1: Research team and reflexivity</b> |                                                                                                                                             |                                                                                                                                                                                                                                                                                                                                                 |
| <i>Personal Characteristics</i>                |                                                                                                                                             |                                                                                                                                                                                                                                                                                                                                                 |
| 1. Interviewer/facilitator                     | Which author/s conducted the interview or focus group?                                                                                      | Five research assistants (four women and one man) hired for this research conducted the interviews. KS and NK supervised the data collection process.                                                                                                                                                                                           |
| 2. Credentials                                 | What were the researcher's credentials? E.g., Ph.D., MD                                                                                     | Ph.D., MSc, MA, MD                                                                                                                                                                                                                                                                                                                              |
| 3. Occupation                                  | What was their occupation at the time of the study?                                                                                         | PhD student, Professor, Assistant Professor, and Director of an NGO                                                                                                                                                                                                                                                                             |
| 4. Gender                                      | Was the researcher male or female?                                                                                                          | All the concerned researchers are male. Four of the local research assistants involved in data collection are female and one male.                                                                                                                                                                                                              |
| 5. Experience and training                     | What experience or training did the researcher have?                                                                                        | KS, RRC, AT, and MJ have experiences in qualitative research.                                                                                                                                                                                                                                                                                   |
| <i>Relationship with participants</i>          |                                                                                                                                             |                                                                                                                                                                                                                                                                                                                                                 |
| 6. Relationship established                    | Was a relationship established before study commencement?                                                                                   | None of the concerned researchers had relationships with the participants until study commencement.                                                                                                                                                                                                                                             |
| 7. Participant knowledge of the interviewer    | What did the participants know about the researcher? e.g., personal goals, reasons for doing the research                                   | None of the participants had contact with the concerned researchers before this study. The aim, objectives, and procedures of the study was explained to the participants before participation.                                                                                                                                                 |
| 8. Interviewer characteristics                 | What characteristics were reported about the interviewer/facilitator? e.g., bias, assumptions, reasons, and interests in the research topic | All of the assistants have a bachelor's degree in public health or sociology. They speak the local language (i.e., Bhojpuri) and are experienced in qualitative research. Before data collection, they were trained to avoid the biases that typically interfere with the collection of qualitative data and to address ethical considerations. |

**Domain 2: Study design***Theoretical framework*

|                                          |                                                                                                                                                           |                                                                                                                                                                                                                |
|------------------------------------------|-----------------------------------------------------------------------------------------------------------------------------------------------------------|----------------------------------------------------------------------------------------------------------------------------------------------------------------------------------------------------------------|
| 9. Methodological orientation and Theory | What methodological orientation was stated to underpin the study? e.g., grounded theory, discourse analysis, ethnography, phenomenology, content analysis | The socio-ecological model was adopted as the theoretical framework that guided the development of research tools. Also, a directed approach to content analysis was employed for data analysis in this study. |
|------------------------------------------|-----------------------------------------------------------------------------------------------------------------------------------------------------------|----------------------------------------------------------------------------------------------------------------------------------------------------------------------------------------------------------------|

*Participant selection*

|                        |                                                                                     |                                                                              |
|------------------------|-------------------------------------------------------------------------------------|------------------------------------------------------------------------------|
| 10. Sampling           | How were participants selected? e.g., purposive, convenience, consecutive, snowball | Convenience sampling                                                         |
| 11. Method of approach | How were participants approached? e.g., face-to-face, telephone, mail, email        | Door-to-door visits.                                                         |
| 12. Sample size        | How many participants were in the study?                                            | 70 participants (60 for IDIs and 10 for KIIs)                                |
| 13. Non-participation  | How many people refused to participate or dropped out? Reasons?                     | None of the participants refused to participate or dropped out in the study. |

*Setting*

|                                    |                                                                                    |                                                                                                                                |
|------------------------------------|------------------------------------------------------------------------------------|--------------------------------------------------------------------------------------------------------------------------------|
| 14. The setting of data collection | Where was the data collected? e.g., home, clinic, workplace                        | IDIs and KIIs were conducted in a private space that was chosen by the participants and at a time that was convenient to them. |
| 15. Presence of nonparticipants    | Was anyone else present besides the participants and researchers?                  | Nobody                                                                                                                         |
| 16. Description of sample          | What are the important characteristics of the sample? e.g., demographic data, date | Characteristics of the IDI participants are provided in Table 2.                                                               |

*Data collection*

|                       |                                                                               |                                                                                                                                                                                                                                                                                                                                                                                   |
|-----------------------|-------------------------------------------------------------------------------|-----------------------------------------------------------------------------------------------------------------------------------------------------------------------------------------------------------------------------------------------------------------------------------------------------------------------------------------------------------------------------------|
| 17. Interview guide   | Were questions, prompts, guides provided by the authors? Was it pilot tested? | Based on literature reviews, the authors developed the conceptual framework (Figure 1) that guided the development of research tools. For each group of the participants, a separate topic guide was developed and used. Prior to data collection, a topic guide was pretested on two married adolescent girls to determine the feasibility of the tool and refine the questions. |
| 18. Repeat interviews | Were repeat interviews carried out? If yes, how many?                         | No.                                                                                                                                                                                                                                                                                                                                                                               |

|                            |                                                                          |                                                                                                                    |
|----------------------------|--------------------------------------------------------------------------|--------------------------------------------------------------------------------------------------------------------|
| 19. Audio/visual recording | Did the research use audio or visual recording to collect the data?      | All the IDIs and KIIs were audio-recorded and transcribed verbatim.                                                |
| 20. Fieldnotes             | Were field notes made during and/or after the interview or focus group?  | Field notes were made during the interviews.                                                                       |
| 21. Duration               | What was the duration of the interviews or focus group?                  | The interviews lasted for about one hour.                                                                          |
| 22. Data saturation        | Was data saturation discussed?                                           | Yes. The sample size allowed the researchers to reach thematic saturation that is when no new information emerges. |
| 23. Transcripts returned   | Were transcripts returned to participants for comment and/or correction? | No.                                                                                                                |

---

### Domain 3: Analysis and findings

---

#### *Data analysis*

|                                    |                                                             |                                                                                                                                                                                                                                                             |
|------------------------------------|-------------------------------------------------------------|-------------------------------------------------------------------------------------------------------------------------------------------------------------------------------------------------------------------------------------------------------------|
| 24. Number of data coders          | How many data coders coded the data?                        | Two researchers (KS and NK) were responsible for coding.                                                                                                                                                                                                    |
| 25. Description of the coding tree | Did authors provide a description of the coding tree?       | No.                                                                                                                                                                                                                                                         |
| 26. Derivation of themes           | Were themes identified in advance or derived from the data? | Themes were identified in advance based on the social-ecological model and literature reviews. However, new codes were given to any texts that could not be categorized with the initial coding scheme.                                                     |
| 27. Software                       | What software, if applicable, was used to manage the data?  | We used NVivo 9 (QSR International, Cambridge, MA) to facilitate coding, organization, searching for meaning units embedded within the English transcripts, and systematically compare the emergent categories and themes both within and across the cases. |
| 28. Participant checking           | Did participants provide feedback on the findings?          | Respondent validation could not be conducted due to logistical constraints, and lack of personal information of the respondents.                                                                                                                            |

#### *Reporting*

|                                  |                                                                                                                                  |                                                                                    |
|----------------------------------|----------------------------------------------------------------------------------------------------------------------------------|------------------------------------------------------------------------------------|
| 29. Quotations presented         | Were participant quotations presented to illustrate the themes/findings? Was each quotation identified? e.g., participant number | Participant quotations are presented to illustrate themes.                         |
| 30. Data and findings consistent | Was there consistency between the data presented and the findings?                                                               | Consistency between the data presented and the findings is ensured in the article. |

---

|                             |                                                                          |                                                                                                                |
|-----------------------------|--------------------------------------------------------------------------|----------------------------------------------------------------------------------------------------------------|
| 31. Clarity of major themes | Were major themes clearly presented in the findings?                     | Yes, in the results section.                                                                                   |
| 32. Clarity of minor themes | Is there a description of diverse cases or a discussion on minor themes? | Relatively minor themes that are supported by a few participant quotations are included in the result section. |

---

Reference: Tong A, Sainsbury P, Craig J. Consolidated criteria for reporting qualitative research (COREQ): a 32-item checklist for interviews and focus groups. *Int J Qual Health Care*. 2007;19(6):349-57.
